# Supplementary material for: Seeded growth induced amorphous to crystalline transformation of niobium oxide nanostructures
Source: Royal Society of Chemistry journal article supplement (doi:10.1039/c2nr11803c), 2012-01-01
Supplement: c2nr11803c.pdf [file c2nr11803c.pdf]

## Supplementary Information (SI)

# Seeded Growth Induced Amorphous to Crystalline Transformation of Niobium Oxide Nanostructures

Subhra Jana and Robert M. Rioux\*

Department of Chemical Engineering, Pennsylvania State University, University Park, PA 16802, USA.

E-mail: [rioux@engr.psu.edu](mailto:rioux@engr.psu.edu)

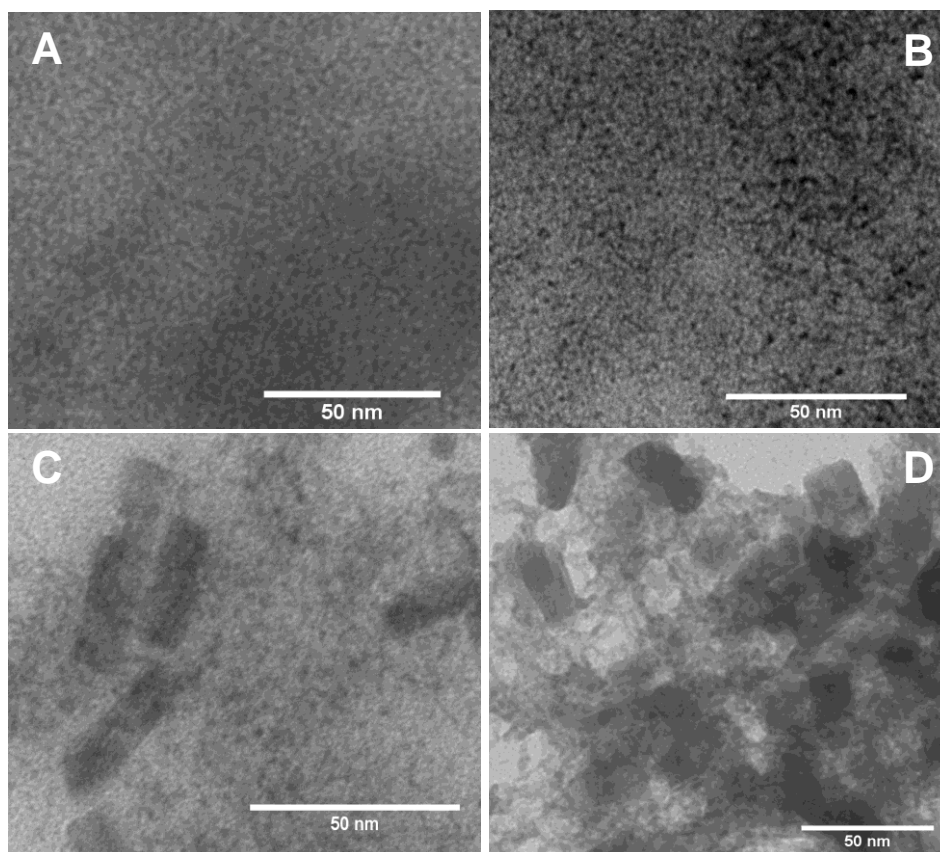

**Figure S1.** Thermal decomposition products of niobium oleate (0.380 g) in 5 mL of squalane, and 0.36 mL oleic acid after 30 minutes at (A) 280, (B) 320, (c) 350, and (D) 400 °C respectively.

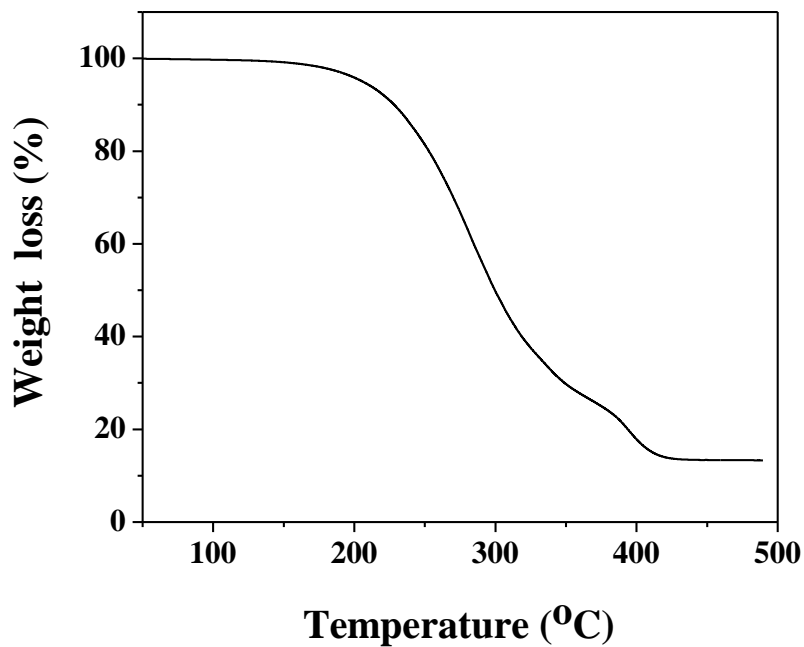

**Figure S2.** Thermogravimetric analysis (TGA) data of Nb-oleate precursor measured in nitrogen from room temperature to 500°C. The remaining weight after 500°C was in agreement with the ceramic yield expected for Nb<sub>2</sub>O<sub>5</sub>. The thermogravimetric data demonstrates that Nb-oleate begins to decompose at ~220-280°C.

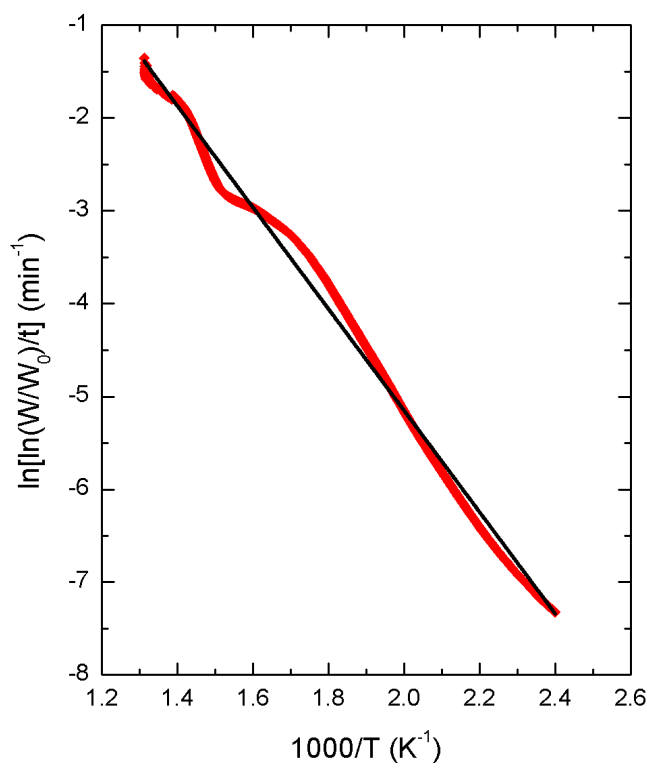

**Figure S3.** Apparent activation energy for the assumed first-order decomposition of Nb-oleate in N<sub>2</sub>. The measured apparent activation energy for decomposition was determined to be 45.4 kJ mol<sup>-1</sup>. This measurement was conducted in an inert, gaseous atmosphere (N<sub>2</sub>) which approximates the high-temperature solution-phase employed during synthesis. Solvation effects are most likely minor at the elevated temperatures used in these syntheses.

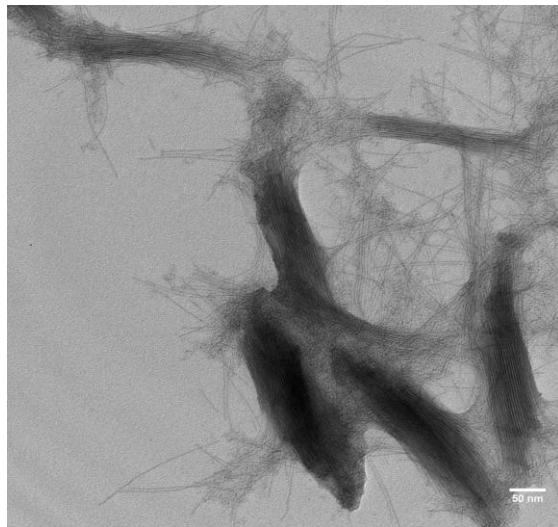

**Figure S4.** TEM image of niobium oxide bundled nanowires after 2 h of sonication. Sonication is unable to break the bundle apart into individual nanowires. Scale bar is 50 nm.

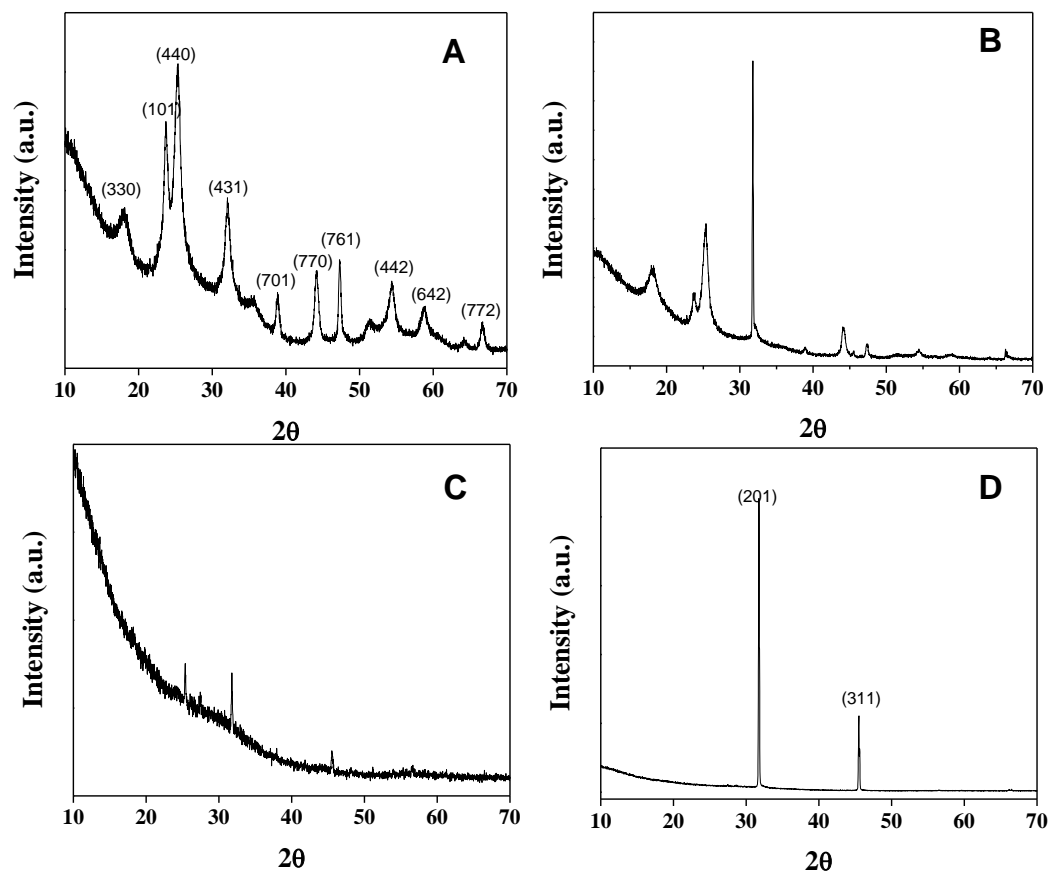

**Figure S5.** XRD patterns of niobium oxide nanostructures obtained by seeded growth at (A) 380, (B) 350, (C) 320, and (D) 300°C respectively.

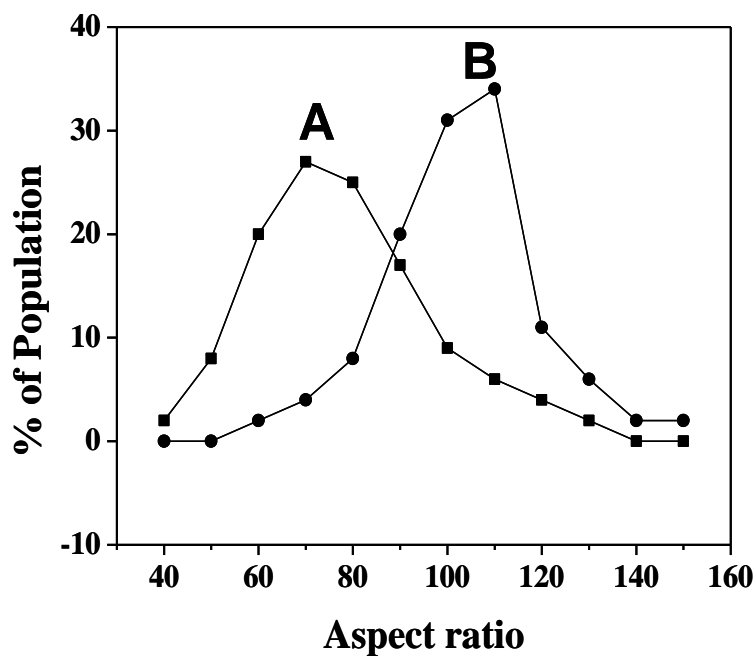

**Figure S6.** Percentage of population of nanowires (100 individuals measured) versus their aspect ratio obtained after the injection of 0.1 mmol Nb-oleate (A) once and (B) twice at 300°C. The corresponding nanoparticles are shown in Fig. 4.

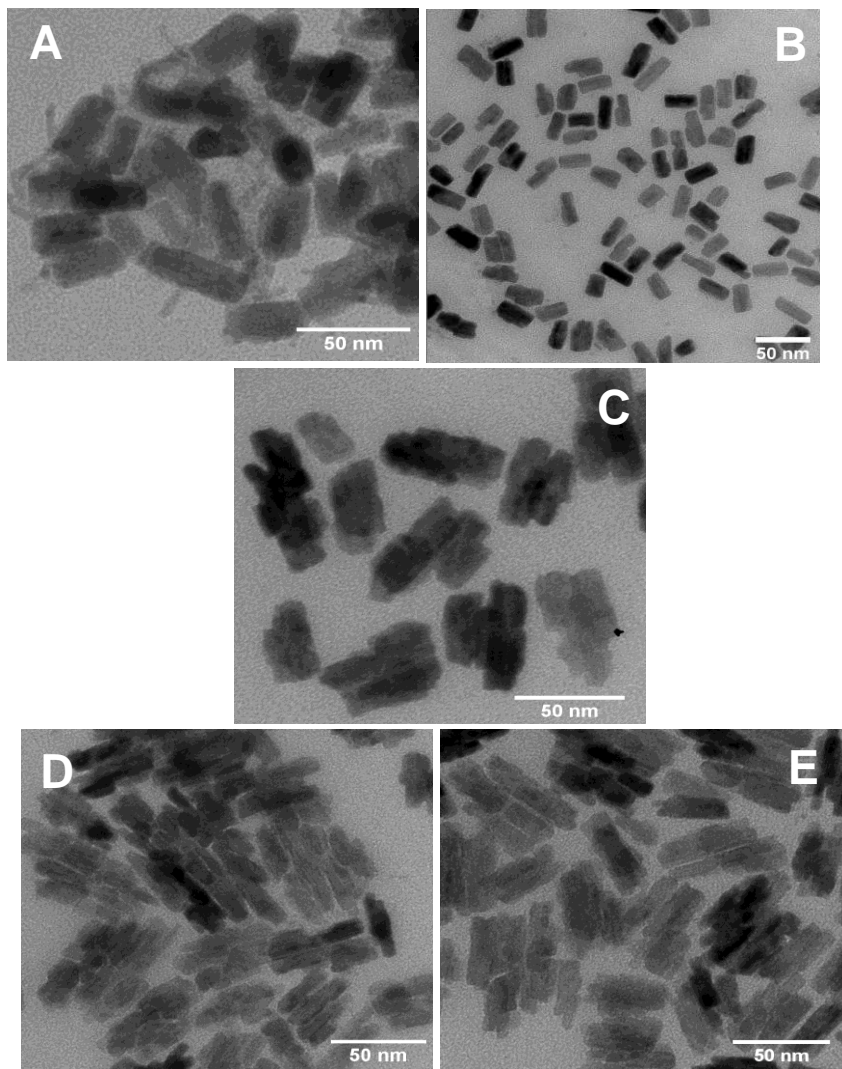

**Figure S7.** TEM images of the particles obtained after the injection of different concentration of niobium oleate solution into the reaction mixture at 380°C; (A) 0.05, (B) 0.10, (C) 0.15, (D) 0.20, and (E) 0.25 mmol.

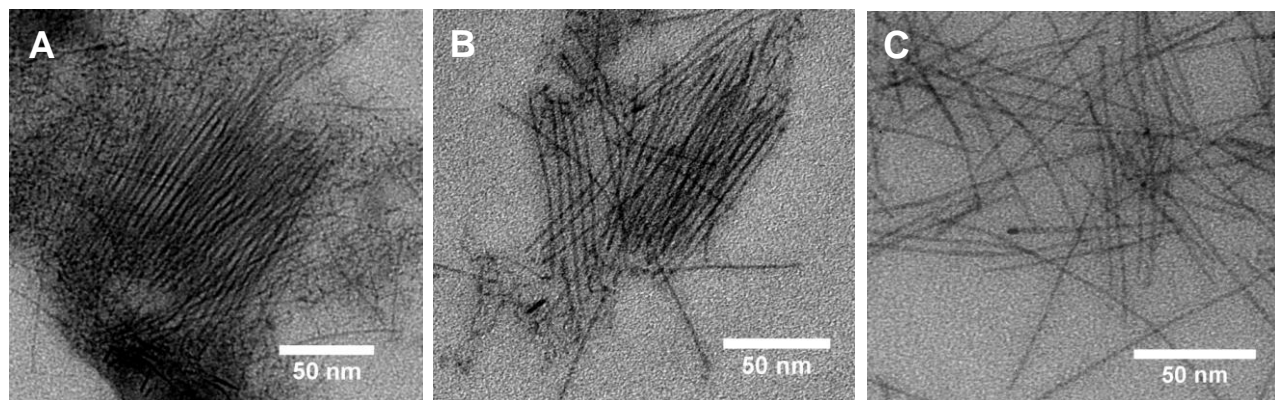

**Figure S8.** TEM images of the time-dependent evolution of nanowires from the initial amorphous material after injection of 0.1 mmol Nb-oleate at 300°C; (A) 10, (B) 15, and (C) 30 minutes, respectively.



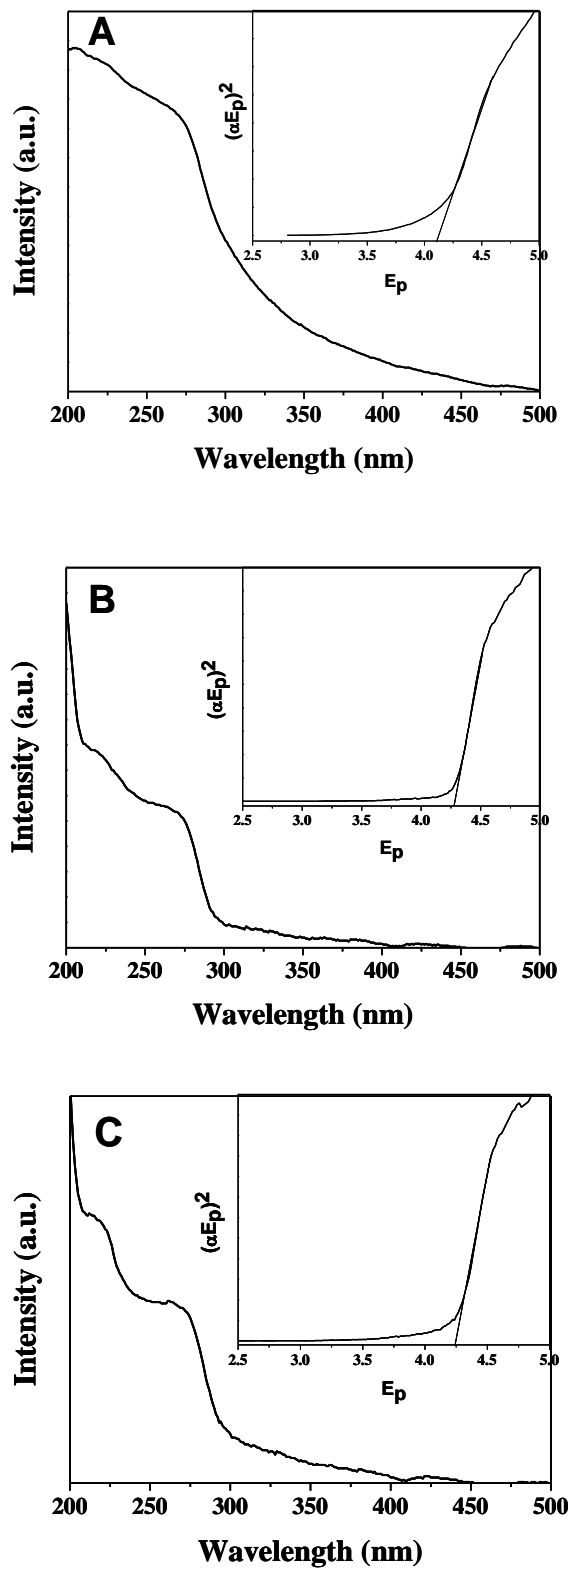

**Figure S9.** UV-Visible absorption spectra of (A) nanoplatelets, (B) nanowires, and (C) bundled nanowires. Insets show the corresponding  $E_p$  vs.  $(\alpha E_p)^2$  curve.
